# Supplementary material for: Risk factors for severe PCR-positive SARS-CoV-2 infection in hospitalized children: a multicenter cohort study
Source: bioRxiv or medRxiv preprint supplement (doi:10.1101/2021.10.28.21265616), 2021-11-08
Supplement: Supplementary file [file media-1.pdf]

## SUPPLEMENT

### **Risk factors for severe PCR-positive SARS-CoV-2 infection in hospitalized children: a multicenter cohort study**

#### **Supplementary Methods**

**eTable 1.** Multivariable logistic regression models focusing only on baseline characteristics as risk factors for severe PCR-positive SARS-CoV-2 infection (WHO COVID-19 clinical progression scale of  $\geq 6$ )

**eTable 2.** Demographic and clinical characteristics of patients PCR-positive SARS-CoV-2 infection (n=403) according to severity of disease (WHO COVID-19 clinical progression scale of  $\geq 6$  and/or ICU admission)

**eTable 3** Age stratified univariable logistic regression analysis among children aged younger than 12 years (n=308) and adolescents 12 years of age and older (n=93) for severe PCR-positive SARS-CoV-2 infection (WHO COVID-19 clinical progression scale of  $\geq 6$ )

**eTable 4.** Demographic and clinical characteristics among children aged less than 12 years (n=308) according to according to severity of disease (WHO COVID-19 clinical progression scale of  $\geq 6$ )

**eTable 5.** Demographic and clinical characteristics among adolescents aged 12 to 17 years (n=93) according severity of disease (WHO COVID-19 clinical progression scale of  $\geq 6$ )

**eTable 6.** Multivariable logistic regression models for factors associated with severe PCR-positive SARS-CoV-2 infection (WHO COVID-19 progression scale of  $\geq 6$ ), stratified according to age groups

**eTable 7.** Demographic and clinical characteristics among non-MIS-C patients (n=322) with PCR-positive SARS-CoV-2 infection, according to severity of disease (WHO COVID-19 clinical progression scale of  $\geq 6$ )

**eTable 8.** Multivariable logistic regression models among non-MIS-C patients for factors associated with severe PCR-positive SARS-CoV-2 infection (WHO COVID-19 clinical progression scale of  $\geq 6$ ).

## Supplementary Methods

Ethics approval was obtained from the following ethics review boards: Comité Ético Científico Hospital Nacional de Niños, San José, Costa Rica (CEC-HNN-030-2020), Iran University of Medical Sciences Ethics Review Committee (IR.IUMS.REC.1399.187), The Hospital for Sick Children Research Ethics Board (#1000070091), Pediatric Panel of the Research Ethics Board of the Research Institute of the McGill University Health Centre (#MP-37-2021-6561), Conjoint Health Research Ethics Board, University of Calgary (REB20-0594), Children's Hospital of Eastern Ontario Research Ethics Board (CHEOREB# 20/32X), University of British Columbia Children's and Women's Research Ethics Board (# H20-00977), Health Research Ethics Board, University of Manitoba (HSC23858), University of Saskatchewan Biomedical Research Ethics Board (Study 1921), Hamilton Integrated Research Ethics Board (ID 11240), Centre Hospitalier Universitaire de Québec-Université Laval (37-2021-6561), and Health Research Ethics Board, University of Alberta (Pro00099426), CHU Sainte-Justine, Université de Montréal (MEO-37-2021-3123), Lawson Health Research Institute (ReDA ID 9857), Trillium Health Partners Research Ethics Board (#1002), Queen's University Health Sciences & Affiliated Teaching Hospitals Research Ethics Board (#6029527), IWK Research Ethics Board (#1026214), Newfoundland and Labrador Health Research Ethics Board (# 2020.047)

Classification of chronic health condition was the following: neurological, cardiac, pulmonary (including asthma), metabolic (including diabetes mellitus), renal, and chromosomal disorders; immunosuppression (including malignancy), obesity, prematurity (<37 weeks gestational age), anemia and/or hemoglobinopathy and 'other' comorbidities which included patients who could not be classified into the previous categories.

**eTable 1.** Multivariable logistic regression models focusing only on baseline characteristics as risk factors for severe PCR-positive SARS-CoV-2 infection (WHO COVID-19 clinical progression scale of  $\geq 6$ ). (n=401)

Model 1 incorporates the number of comorbidities, model 2 selected individual comorbidities

| <b>Covariates</b>                   | <b>Model 1</b><br>aOR (95% CI) | <b>Model 2</b><br>aOR (95% CI) |
|-------------------------------------|--------------------------------|--------------------------------|
| <b>Age category</b>                 |                                |                                |
| <1 year                             | Ref.                           | Ref.                           |
| 1-4 years                           | 1.41 (0.71-2.79)               | 1.45 (0.73-2.86)               |
| 5-11 years                          | 1.52 (0.75-3.05)               | 1.32 (0.65-2.68)               |
| $\geq 12$ years                     | <b>2.22 (1.12-4.40)</b>        | 1.41 (0.66-3.00)               |
|                                     |                                |                                |
| <b>Comorbidities</b>                |                                |                                |
| None                                | Ref.                           | -                              |
| 1 comorbidity                       | 1.32 (0.76-2.29)               | -                              |
| Multiple ( $\geq 2$ ) comorbidities | <b>2.00 (1.09-3.65)</b>        | -                              |
|                                     |                                |                                |
| Obesity                             | -                              | <b>3.42 (1.66-7.06)</b>        |
| Anemia or hemoglobinopathy          | -                              | <b>3.14 (1.00-9.88)</b>        |
| Neurological disorders              | -                              | <b>2.12 (1.13-3.95)</b>        |

aOR adjusted odds ratio; CI confidence intervals

**eTable 2.** Demographic and clinical characteristics of patients PCR-positive SARS-CoV-2 infection (n=403) according to severity of disease (WHO COVID-19 clinical progression scale of  $\geq 6$  and/or ICU admission)

|                                                 | Mild/Moderate Disease*<br>N=275 (%) | Severe Disease and/or ICU admission*<br>N=128 (%) | p-value**    |
|-------------------------------------------------|-------------------------------------|---------------------------------------------------|--------------|
| <b>Demographics</b>                             |                                     |                                                   |              |
| Median Age in years (IQR) <sup>1</sup>          | 3.09 (0.30-10.10)                   | 6.04 (1.24-12.67)                                 | <b>0.004</b> |
| Age $\leq 30$ days                              | 30 (81.1%)                          | 7 (18.9%)                                         | 0.115        |
| Age category <sup>1</sup>                       |                                     |                                                   |              |
| <1 year                                         | 88 (77.9%)                          | 25 (22.1%)                                        | <b>0.024</b> |
| 1-4 years                                       | 74 (69.8%)                          | 32 (30.2%)                                        |              |
| 5-11 years                                      | 55 (61.8%)                          | 34 (38.2%)                                        |              |
| $\geq 12$ years                                 | 56 (60.2%)                          | 37 (39.8%)                                        |              |
| Male sex                                        | 157 (69.2%)                         | 70 (30.8%)                                        | 0.730        |
| Admission period                                |                                     |                                                   |              |
| Prior to July 1, 2020                           | 14 (73.7%)                          | 5 (26.3%)                                         | 0.438        |
| July 1, 2020 to Dec 31, 2020                    | 108 (71.5%)                         | 43 (28.5%)                                        |              |
| Jan 1, 2021 to May 31, 2021                     | 153 (65.7%)                         | 80 (34.3%)                                        |              |
| Admitted in Canada                              | 175 (65.8%)                         | 91 (34.2%)                                        | 0.174        |
| <b>Number of Comorbidities</b>                  |                                     |                                                   |              |
| None                                            | 157 (72.7%)                         | 59 (27.3%)                                        | 0.051        |
| At least 1 comorbidity                          | 118 (63.1%)                         | 69 (36.9%)                                        |              |
| Multiple ( $\geq 2$ ) comorbidities             | 42 (56.0%)                          | 33 (44.0%)                                        | <b>0.017</b> |
| None                                            | 157 (72.7%)                         | 59 (27.3%)                                        | <b>0.028</b> |
| 1 comorbidity                                   | 76 (67.8%)                          | 36 (32.1%)                                        |              |
| Multiple ( $\geq 2$ ) comorbidities             | 42 (56.0%)                          | 33 (44.0%)                                        |              |
| <b>Individual comorbidities<sup>2</sup></b>     |                                     |                                                   |              |
| Obesity                                         | 24 (48.0%)                          | 26 (52.0%)                                        | <b>0.002</b> |
| Pulmonary disorders                             | 32 (59.2%)                          | 22 (40.7%)                                        | 0.172        |
| Non-asthma pulmonary disorders <sup>3</sup>     | 10 (45.4%)                          | 12 (54.5%)                                        | <b>0.034</b> |
| Asthma                                          | 22 (68.7%)                          | 10 (31.2%)                                        | 1.0          |
| Prematurity (<37 weeks gestational age)         | 17 (56.7%)                          | 13 (43.3%)                                        | 0.226        |
| Immunosuppression                               | 26 (83.9%)                          | 5 (16.1%)                                         | 0.069        |
| Malignancy <sup>4</sup>                         | 15 (93.7%)                          | 1 (6.2%)                                          | <b>0.027</b> |
| Anemia or hemoglobinopathy <sup>5</sup>         | 7 (53.8%)                           | 6 (43.1%)                                         | 0.406        |
| Sickle cell anemia                              | 4 (66.7%)                           | 2 (33.3%)                                         | 1.0          |
| Neurological disorders <sup>6</sup>             | 30 (53.6%)                          | 26 (46.4%)                                        | <b>0.017</b> |
| Cardiac disorders                               | 12 (63.1%)                          | 7 (36.8%)                                         | 0.814        |
| Metabolic disorders                             | 6 (50.0%)                           | 6 (50.0%)                                         | 0.288        |
| Diabetes mellitus                               | 2 (40.0%)                           | 3 (60.0%)                                         | 0.332        |
| Renal disorders                                 | 7 (50.0%)                           | 7 (50.0%)                                         | 0.230        |
| Hypertension                                    | 4 (44.4%)                           | 5 (55.5%)                                         | 0.150        |
| Chromosomal disorders <sup>7</sup>              | 3 (37.5%)                           | 5 (62.5%)                                         | 0.116        |
| Other <sup>8</sup>                              | 13 (52.0%)                          | 12 (48.0%)                                        | 0.114        |
| <b>Clinical Features</b>                        |                                     |                                                   |              |
| Fever prior to or during admission <sup>9</sup> | 207 (68.5%)                         | 95 (31.4%)                                        | 0.445        |

|                                                                  |             |            |                  |
|------------------------------------------------------------------|-------------|------------|------------------|
| Cough                                                            | 135 (64.9%) | 73 (35.1%) | 0.168            |
| Shortness of breath                                              | 100 (53.2%) | 88 (46.8%) | <b>&lt;0.001</b> |
| Vomiting                                                         | 83 (65.3%)  | 44 (34.6%) | 0.466            |
| Rhinitis                                                         | 90 (72.0%)  | 35 (28.0%) | 0.331            |
| Diarrhea                                                         | 81 (70.4%)  | 34 (29.6%) | 0.631            |
| Abdominal pain                                                   | 70 (64.8%)  | 38 (35.2%) | 0.440            |
| Headache                                                         | 46 (63.9%)  | 26 (36.1%) | 0.462            |
| Rash                                                             | 45 (65.2%)  | 24 (34.8%) | 0.653            |
| Conjunctivitis                                                   | 39 (57.3%)  | 29 (42.6%) | <b>0.049</b>     |
| Myalgia                                                          | 40 (66.7%)  | 20 (33.3%) | 0.894            |
| Pharyngitis                                                      | 46 (76.7%)  | 14 (23.3%) | 0.171            |
| Wheeze                                                           | 34 (63.0%)  | 20 (37.0%) | 0.461            |
| Chest pain                                                       | 26 (66.7%)  | 13 (33.3%) | 0.967            |
| Cracked lips                                                     | 22 (57.9%)  | 16 (42.1%) | 0.209            |
| Edema of hands and feet                                          | 16 (59.2%)  | 11 (40.7%) | 0.410            |
| Anosmia                                                          | 8 (66.7%)   | 4 (33.3%)  | 1.0              |
| Seizures                                                         | 5 (45.4%)   | 6 (54.5%)  | 0.111            |
| <b>Coinfections</b>                                              |             |            |                  |
| Bacterial (positive cultures) <sup>10</sup>                      | 13 (54.2%)  | 11 (45.8%) | 0.193            |
| Viral                                                            | 15 (46.9%)  | 17 (53.1%) | <b>0.012</b>     |
| Bacterial and/or viral                                           | 28 (51.8%)  | 26 (48.1%) | <b>0.009</b>     |
| <b>Imaging</b>                                                   |             |            |                  |
| No chest imaging performed                                       | 86 (94.5%)  | 5 (5.5%)   | <b>&lt;0.001</b> |
| CXR and/or CT chest normal or had findings unrelated to COVID-19 | 96 (79.3%)  | 25 (20.7%) |                  |
| CXR and/or CT chest abnormalities compatible with COVID-19       | 93 (48.7%)  | 98 (51.3%) |                  |
| <b>Laboratory investigations</b>                                 |             |            |                  |
| Leukopenia (<4 X10 <sup>9</sup> /L) <sup>11</sup>                | 44 (74.6%)  | 15 (25.4%) | 0.239            |
| Leukocytosis (>15x10 <sup>9</sup> /L) <sup>11</sup>              | 30 (63.8%)  | 17 (36.2%) | 0.731            |
| Neutropenia (<1.5x 10 <sup>9</sup> /L) <sup>12</sup>             | 68 (80.9%)  | 16 (19.0%) | <b>&lt;0.001</b> |
| Normal neutrophil count <sup>12</sup>                            | 131 (72.0%) | 51 (28.0%) |                  |
| Neutrophilia <sup>12</sup>                                       | 56 (48.3%)  | 60 (51.7%) | <b>0.004</b>     |
| Thrombocytopenia (<100 x 10 <sup>9</sup> /L) <sup>13</sup>       | 22 (52.4%)  | 20 (47.6%) |                  |
| Normal platelet count <sup>13</sup>                              | 189 (72.4%) | 72 (27.6%) |                  |
| Thrombocytosis (>450 x 10 <sup>9</sup> /L) <sup>13</sup>         | 47 (57.3%)  | 35 (42.7%) | <b>&lt;0.001</b> |
| CRP not done <sup>14</sup>                                       | 49 (81.7%)  | 11 (18.3%) |                  |
| Normal CRP <sup>14</sup>                                         | 165 (73.7%) | 59 (26.3%) |                  |
| CRP >50 (mg/L) <sup>14</sup>                                     | 61 (51.3%)  | 58 (48.7%) | 0.160            |
| Ferritin >500 (mcg/L) <sup>15</sup>                              | 24 (43.6%)  | 31 (56.4%) |                  |
| Albumin<29 (g/L) <sup>16</sup>                                   | 17 (36.9%)  | 29 (63.0%) | <b>&lt;0.001</b> |
| <b>Complications</b>                                             |             |            |                  |
| MIS-C diagnosis                                                  | 44 (54.3%)  | 37 (45.7%) | <b>0.004</b>     |

CT computed tomography; CRP C-reactive protein; CXR chest x-ray; IQR interquartile range; MIS-C multisystem inflammatory syndrome in children

\* Percentages were calculated for the row, i.e., % of a stratum with severe or mild/moderate disease.

\*\* Comparisons performed using chi squared or Fisher's exact test as appropriate for categorical data and Wilcoxon rank sum test for continuous data as appropriate.

- <sup>1</sup> A total of 2 children with mild/moderate disease are missing date of birth.
- <sup>2</sup> Children are listed more than once if they had more than one comorbidity.
- <sup>3</sup> Clinical information is available for 14/22 patients: obstructive sleep apnea (n=5); bronchopulmonary dysplasia (n=3); pulmonary hypertension (n=2); cystic fibrosis (n=1); chronic aspiration pneumonia (n=1); subglottic stenosis (n=1); Pierre-Robin anomaly (n=1)
- <sup>4</sup> Malignancy consists of the following: acute lymphoblastic leukemia (n=11); neuroblastoma (n=2); lymphoma (n=1); rhabdomyosarcoma (n=1); and osteosarcoma (n=1)
- <sup>5</sup> Anemia and/or hemoglobinopathy consist of the following: sickle cell disease (n=6); Glucose-6-phosphate dehydrogenase deficiency (n=2); anemia of chronic disease (n=2); ovalocytosis (n=1); pancytopenia of unknown etiology (n=1); iron deficient anemia (n=1)
- <sup>6</sup> Additional information is available for 47/56 patients: syndromic condition with global developmental delay (GDD) (n=19); autism and/or GDD of unexplained etiology (n=10); cerebral palsy (n=7); muscular dystrophy (n=3); hydrocephalus (n=2); congenital microcephaly (n=2); brain tumor (n=1); focal cortical dysplasia (n=1); encephalopathy (n=1); epilepsy (n=1)
- <sup>7</sup> Additional information is available for 7/8 patients: Trisomy 21 (n=3); unbalanced translocation (n=2); Prader-Willi syndrome (n=1); Miller-Dieker syndrome (n=1)
- <sup>8</sup> Other consists of the following: gastrostomy (n=12); liver transplantation (n=2); celiac disease (n=1); Crohn's disease (n=1) failure to thrive (n=1); inflammatory bowel disease (n=1); inflammatory bowel disease and Hirschsprung disease (n=1); unclear liver disease (n=1); esophageal atresia (n=1); scoliosis (n=2); liver cirrhosis & cholestasis (n=1); Glanzmann thrombasthenia (n=1)
- <sup>9</sup> A total of 35 children were missing data on fever prior to or during admission (19 with mild/moderate disease and 16 with severe disease) resulting in a total N of 368.
- <sup>10</sup> Children with one of the following are included: blood culture thought to be truly positive and/or positive endotracheal tube cultures treated with antibiotics for presumptive bacterial pneumonia and/or positive bacterial culture from another site treated with antibiotics.
- <sup>11</sup> A total of 17 children were missing leukocyte values (16 with mild/moderate disease and 1 with severe disease) resulting in a total N of 386.
- <sup>12</sup> A total of 21 children were missing neutrophil values (20 with mild/moderate disease and 1 with severe disease) resulting in a total N of 382. Cut-off values for neutrophilia are age dependent.
- <sup>13</sup> A total of 18 children were missing a platelet value (17 with mild/moderate disease and 1 with severe disease) resulting in a total N of 385.
- <sup>14</sup> A total of 60 children were missing a CRP value (49 with mild/moderate disease and 11 with severe disease) resulting in a total N of 343.
- <sup>15</sup> The highest ferritin value measured variable used and a total of 220 children were missing a value (179 with mild/moderate disease and 41 with severe disease) resulting in a total N of 183.
- <sup>16</sup> A total of 271 children were missing albumin values (199 with mild/moderate disease and 72 with severe disease) resulting in a total N of 132.

**eTable 3** Age stratified univariable logistic regression analysis among children aged younger than 12 years (n=308) and adolescents 12 years of age and older (n=93) for severe PCR-positive SARS-CoV-2 infection (WHO COVID-19 clinical progression scale of  $\geq 6$ )

|                                                            | <b>Unadjusted OR among those younger than 12 years of age N=308</b> | <b>Unadjusted OR among those 12 years of age and older N=93</b> |
|------------------------------------------------------------|---------------------------------------------------------------------|-----------------------------------------------------------------|
|                                                            | <b>OR (95% CI)</b>                                                  | <b>OR (95% CI)</b>                                              |
| <b>Number of comorbidities</b>                             |                                                                     |                                                                 |
| None                                                       | Ref.                                                                | Ref.                                                            |
| 1 comorbidity                                              | 1.14 (0.58-2.25)                                                    | 1.78 (0.65-4.87)                                                |
| Multiple ( $\geq 2$ ) comorbidities                        | <b>2.85 (1.45-5.58)</b>                                             | 1.22 (0.39-3.86)                                                |
| <b>Individual comorbidities</b>                            |                                                                     |                                                                 |
| Obesity                                                    | <b>3.70 (1.15-11.86)</b>                                            | <b>2.93 (1.22-7.05)</b>                                         |
| Pulmonary disorders                                        | <b>2.38 (1.17-4.82)</b>                                             | 0.69 (0.20-2.40)                                                |
| Non-asthma pulmonary disorders                             | <b>4.33 (1.60-11.70)</b>                                            | 0.44 (0.05-4.08)                                                |
| Anemia or hemoglobinopathy                                 | 3.03 (0.90-10.26)                                                   | 1.84 (0.11-30.47)                                               |
| Neurological disorders                                     | <b>2.74 (1.33-5.63)</b>                                             | 1.42 (0.51-3.99)                                                |
| Cardiac disorders                                          | 2.43 (0.83-7.09)                                                    | -                                                               |
| Hypertension                                               | 3.57 (0.70-18.13)                                                   | 3.81 (0.33-43.65)                                               |
| Chromosomal disorders                                      | <b>4.84 (1.06-22.18)</b>                                            | -                                                               |
| <b>Clinical Features</b>                                   |                                                                     |                                                                 |
| Fever prior to or during admission                         | 0.86 (0.42-1.77)                                                    | 4.05 (0.84-19.44)                                               |
| Shortness of breath                                        | <b>5.98 (3.30-10.86)</b>                                            | <b>3.73 (1.26-11.02)</b>                                        |
| Conjunctivitis                                             | 1.63 (0.85-3.10)                                                    | 1.61 (0.45-5.73)                                                |
| Pharyngitis                                                | 0.40 (0.13-1.17)                                                    | 0.52 (0.18-1.47)                                                |
| Wheeze                                                     | 1.86 (0.94-3.70)                                                    | 0.71 (0.13-3.88)                                                |
| Seizures                                                   | 2.88 (0.75-11.03)                                                   | 1.84 (0.11-30.47)                                               |
| <b>Coinfections</b>                                        |                                                                     |                                                                 |
| Bacterial and/or viral                                     | <b>4.11 (2.10-8.02)</b>                                             | 1.24 (0.32-4.76)                                                |
| <b>Imaging</b>                                             |                                                                     |                                                                 |
| CXR and/or CT normal or had findings unrelated to COVID-19 | Ref.                                                                | Ref.                                                            |
| No chest imaging done                                      | <b>0.07 (0.01-0.52)</b>                                             | 0.54 (0.04-6.77)                                                |
| CXR or CT abnormalities compatible with COVID-19           | <b>3.57 (1.90-6.70)</b>                                             | <b>5.57 (1.16-26.69)</b>                                        |
| <b>Laboratory investigations</b>                           |                                                                     |                                                                 |
| Neutropenia ( $<1.5 \times 10^9/L$ )                       | 0.72 (0.32-1.66)                                                    | 1.38 (0.42-4.52)                                                |
| Normal neutrophil count                                    | Ref.                                                                | Ref.                                                            |
| Neutrophilia                                               | <b>3.02 (1.64-5.58)</b>                                             | <b>3.23 (1.17-8.94)</b>                                         |
| Thrombocytopenia ( $<100 \times 10^9/L$ )                  | 1.79 (0.78-4.07)                                                    | 1.10 (0.24-5.01)                                                |
| Normal platelet count                                      | Ref.                                                                | Ref.                                                            |
| Thrombocytosis ( $>450 \times 10^9/L$ )                    | 1.66 (0.89-3.09)                                                    | 2.30 (0.56-9.35)                                                |
| CRP not done                                               | Ref.                                                                | Ref.                                                            |
| Normal CRP                                                 | 1.18 (0.53-2.65)                                                    | -                                                               |
| CRP $>50$ (mg/L)                                           | 2.04 (0.86-4.84)                                                    | -                                                               |
| <b>Complications</b>                                       |                                                                     |                                                                 |
| MIS-C                                                      | 1.52 (0.81-2.85)                                                    | 1.60 (0.56-4.55)                                                |

Note. Among those less than 12 years of age, N for model with fever is 281 as 27 deleted due to missingness, N for models with neutrophil counts are 292 as 16 deleted due to missingness, N for models with platelet counts

are 295 as 13 deleted due to missingness. Among those 12 years of age and older, N for model with fever is 86 as 7 deleted due to missingness, N for models with neutrophil counts and platelet counts are 88 as 5 deleted due to missingness.

OR odds ratio; CT computed tomography; CRP C-reactive protein; CXR chest x-ray; IQR interquartile range; MIS-C multisystem inflammatory syndrome in children



**eTable 4.** Demographic and clinical characteristics among children aged less than 12 years (n=308) according to severity of disease (WHO COVID-19 clinical progression scale of  $\geq 6$ )

|                                                 | Mild/Moderate Disease*<br>N=239 (%) | Severe Disease*<br>N=69 (%) | p-value**        |
|-------------------------------------------------|-------------------------------------|-----------------------------|------------------|
| <b>Demographics</b>                             |                                     |                             |                  |
| Male sex                                        | 136 (76.8%)                         | 41 (23.2%)                  | 0.815            |
| Admission period                                |                                     |                             |                  |
| Prior to July 1, 2020                           | 13 (81.2%)                          | 3 (18.7%)                   | 0.973            |
| Between July 1, 2020 to Dec 31, 2020            | 97 (78.2%)                          | 27 (21.8%)                  |                  |
| Between Jan 1, 2021 to May 31, 2021             | 129 (76.8%)                         | 39 (23.2%)                  |                  |
| Admitted in Canada                              | 138 (77.5%)                         | 40 (22.5%)                  | 1.0              |
| <b>Number of Comorbidities</b>                  |                                     |                             |                  |
| None                                            | 150 (81.5%)                         | 34 (18.5%)                  | 0.061            |
| At least 1 comorbidity                          | 89 (71.8%)                          | 35 (28.2%)                  |                  |
| Multiple ( $\geq 2$ ) comorbidities             | 31 (60.8%)                          | 20 (39.2%)                  | <b>0.001</b>     |
| None                                            | 150 (81.5%)                         | 34 (18.5%)                  | <b>0.007</b>     |
| 1 comorbidity                                   | 58 (79.4%)                          | 15 (20.5%)                  |                  |
| Multiple ( $\geq 2$ ) comorbidities             | 31 (60.8%)                          | 20 (39.2%)                  |                  |
| <b>Individual comorbidities<sup>1</sup></b>     |                                     |                             |                  |
| Obesity                                         | 6 (50.0%)                           | 6 (50.0%)                   | <b>0.047</b>     |
| Pulmonary disorders                             | 25 (62.5%)                          | 15 (37.5%)                  | <b>0.024</b>     |
| Non-asthma pulmonary disorders                  | 8 (47.0%)                           | 9 (52.9%)                   | <b>0.005</b>     |
| Asthma                                          | 17 (73.9%)                          | 6 (26.1%)                   | 0.857            |
| Prematurity (<37 weeks gestational age)         | 20 (71.4%)                          | 8 (28.6%)                   | 0.560            |
| Immunosuppression                               | 18 (81.8%)                          | 4 (18.2%)                   | 0.793            |
| Cancer                                          | 12 (92.3%)                          | 1 (7.7%)                    | 0.310            |
| Anemia or hemoglobinopathy                      | 6 (54.5%)                           | 5 (45.4%)                   | 0.073            |
| Sickle cell anemia                              | 3 (75.0%)                           | 1 (25.0%)                   | 1.0              |
| Neurological disorders                          | 22 (59.4%)                          | 15 (40.5%)                  | <b>0.009</b>     |
| Cardiac disorders                               | 9 (60.0%)                           | 6 (40.0%)                   | 0.174            |
| Metabolic disorders                             | 5 (83.3%)                           | 1 (16.7%)                   | 1.0              |
| Diabetes mellitus                               | 1 (100.0%)                          | 0                           | 1.0              |
| Renal disorders                                 | 7 (58.3%)                           | 5 (41.7%)                   | 0.201            |
| Hypertension                                    | 3 (50.0%)                           | 3 (50.0%)                   | 0.128            |
| Chromosomal disorders                           | 3 (42.8%)                           | 4 (57.1%)                   | <b>0.047</b>     |
| Other                                           | 11 (64.7%)                          | 6 (35.3%)                   | 0.311            |
| <b>Clinical Features</b>                        |                                     |                             |                  |
| Fever prior to or during admission <sup>2</sup> | 182 (79.5%)                         | 47 (20.5%)                  | 0.826            |
| Cough                                           | 104 (75.4%)                         | 34 (24.6%)                  | 0.478            |
| Shortness of breath                             | 73 (59.3%)                          | 50 (40.6%)                  | <b>&lt;0.001</b> |
| Vomiting                                        | 67 (72.8%)                          | 25 (27.2%)                  | 0.245            |
| Rhinitis                                        | 84 (77.8%)                          | 24 (22.2%)                  | 1.0              |
| Diarrhea                                        | 64 (77.1%)                          | 19 (22.9%)                  | 1.0              |
| Abdominal pain                                  | 61 (76.2%)                          | 19 (23.7%)                  | 0.857            |
| Headache                                        | 33 (75.0%)                          | 11 (25.0%)                  | 0.802            |

|                                                                  |              |            |                  |
|------------------------------------------------------------------|--------------|------------|------------------|
| Rash                                                             | 44 (74.6%)   | 15 (25.4%) | 0.656            |
| Conjunctivitis                                                   | 40 (70.2%)   | 17 (29.8%) | 0.189            |
| Myalgia                                                          | 31 (79.5%)   | 8 (20.5%)  | 0.922            |
| Pharyngitis                                                      | 32 (88.9%)   | 4 (11.1%)  | 0.092            |
| Wheeze                                                           | 31 (67.4%)   | 15 (32.6%) | 0.108            |
| Chest pain                                                       | 11 (73.3%)   | 4 (26.7%)  | 0.751            |
| Cracked lips                                                     | 24 (72.7%)   | 9 (27.3%)  | 0.625            |
| Edema of hands and feet                                          | 16 (72.7%)   | 6 (27.3%)  | 0.762            |
| Anosmia                                                          | 4 (100.0%)   | 0          | 0.578            |
| Seizures                                                         | 5 (55.5%)    | 4 (44.4%)  | 0.117            |
| <b>Coinfections</b>                                              |              |            |                  |
| Bacterial (positive cultures) <sup>3</sup>                       | 10 (55.5%)   | 8 (44.4%)  | <b>0.043</b>     |
| Viral                                                            | 13 (46.4%)   | 15 (53.6%) | <b>&lt;0.001</b> |
| Bacterial and/or viral                                           | 23 (52.3%)   | 21 (47.7%) | <b>&lt;0.001</b> |
| <b>Imaging</b>                                                   |              |            |                  |
| No chest imaging done                                            | 77 (98.7%)   | 1 (1.3%)   | <b>&lt;0.001</b> |
| CXR and/or CT chest normal or had findings unrelated to COVID-19 | 88 (83.8%)   | 17 (16.2%) |                  |
| CXR and/or CT chest abnormalities compatible with COVID-19       | 74 (59.2%)   | 51 (40.8%) |                  |
| <b>Laboratory investigations</b>                                 |              |            |                  |
| Leukopenia (<4 X10 <sup>9</sup> /L) <sup>4</sup>                 | 33 (91.7%)   | 3 (8.3%)   | <b>0.033</b>     |
| Leukocytosis (>15x10 <sup>9</sup> /L) <sup>4</sup>               | 30 (71.4%)   | 12 (28.6%) | 0.472            |
| Neutropenia (<1.5x 10 <sup>9</sup> /L) <sup>5</sup>              | 58 (86.6%)   | 9 (13.4%)  | <b>&lt;0.001</b> |
| Normal neutrophil count <sup>5</sup>                             | 112 (82.3%)  | 24 (17.6%) |                  |
| Neutrophilia <sup>5</sup>                                        | 54 (60.7%)   | 35 (39.3%) |                  |
| Thrombocytopenia (<100 x 10 <sup>9</sup> /L) <sup>6</sup>        | 23 (69.7%)   | 10 (30.3%) | 0.164            |
| Normal platelet count <sup>6</sup>                               | 152 (80.4 %) | 37 (19.6%) |                  |
| Thrombocytosis (>450 x 10 <sup>9</sup> /L) <sup>6</sup>          | 52 (71.2%)   | 21 (28.8%) |                  |
| CRP not done <sup>7</sup>                                        | 42 (82.3%)   | 9 (17.6%)  | 0.133            |
| Normal CRP <sup>7</sup>                                          | 142 (79.8%)  | 36 (20.2%) |                  |
| CRP >50 (mg/L) <sup>7</sup>                                      | 55 (69.6%)   | 24 (30.4%) |                  |
| Ferritin >500 (mcg/L) <sup>8</sup>                               | 24 (63.1%)   | 14 (36.8%) | 0.523            |
| Albumin<29 (g/L) <sup>9</sup>                                    | 21 (56.7%)   | 16 (43.2%) | <b>0.033</b>     |
| <b>Complications</b>                                             |              |            |                  |
| MIS-C diagnosis                                                  | 45 (71.4%)   | 18 (28.6%) | 0.251            |

CT computed tomography; CRP C-reactive protein; CXR chest x-ray; MIS-C multisystem inflammatory syndrome in children

\* Percentages were calculated for the row, i.e., % of a stratum with severe or mild/moderate disease.

\*\* Comparisons performed using chi squared or Fisher's exact test as appropriate for categorical data.

<sup>1</sup> Children are listed more than once if they had more than one comorbidity.

<sup>2</sup> A total of 27 children were missing data on fever prior to or during admission (17 with mild/moderate disease and 10 with severe disease) resulting in a total N of 281.

<sup>3</sup> Children with one of the following are included: blood culture thought to be truly positive and/or positive endotracheal tube cultures treated with antibiotics for presumptive bacterial pneumonia and/or positive bacterial culture from another site treated with antibiotics.

<sup>4</sup> A total of 13 children were missing leukocyte values (12 with mild/moderate disease and 1 with severe disease) resulting in a total N of 295.

<sup>5</sup> A total of 16 children were missing neutrophil values (15 with mild/moderate disease and 1 with severe disease) resulting in a total N of 292. Cut-off values for neutrophilia are age dependent

<sup>6</sup> A total of 13 children were missing platelet values (12 with mild/moderate disease and 1 with severe disease) resulting in a total N of 295.

<sup>7</sup> A total of 51 children were missing a CRP value (42 with mild/moderate disease and 9 with severe disease) resulting in a total N of 257.

<sup>8</sup> The highest ferritin value measured variable used and a total of 181 children were missing a value (152 with mild/moderate disease and 29 with severe disease) resulting in a total N of 127.

<sup>9</sup> A total of 205 children were missing albumin values (166 with mild/moderate disease and 39 with severe disease) resulting in a total N of 103.

**eTable 5.** Demographic and clinical characteristics among adolescents aged 12 to 17 years (n=93) according severity of disease (WHO COVID-19 clinical progression scale of  $\geq 6$ )

|                                                 | Mild/Moderate Disease*<br>N=60 (%) | Severe Disease*<br>N=33 (%) | p-value**    |
|-------------------------------------------------|------------------------------------|-----------------------------|--------------|
| <b>Demographics</b>                             |                                    |                             |              |
| Male sex                                        | 34 (69.4%)                         | 15 (30.6%)                  | 0.413        |
| <b>Admission period</b>                         |                                    |                             |              |
| Prior to July 1, 2020                           | 3 (100.0%)                         | 0                           | 0.112        |
| Between July 1, 2020 to Dec 31, 2020            | 20 (76.9%)                         | 6 (23.1%)                   |              |
| Between Jan 1, 2021 to May 31, 2021             | 37 (57.8%)                         | 27 (42.2%)                  |              |
| Admitted in Canada                              | 56 (64.4%)                         | 31 (35.6%)                  | 1.0          |
| <b>Number of comorbidities</b>                  |                                    |                             |              |
| None                                            | 22 (71.0%)                         | 9 (29.0%)                   | 0.490        |
| At least 1 comorbidity                          | 38 (61.3%)                         | 24 (38.7%)                  |              |
| Multiple ( $\geq 2$ ) comorbidities             | 16 (66.7%)                         | 8 (33.3%)                   | 0.994        |
| None                                            | 22 (71.0%)                         | 9 (29.0%)                   | 0.512        |
| 1 comorbidity                                   | 22 (57.9%)                         | 16 (42.1%)                  |              |
| Multiple ( $\geq 2$ ) comorbidities             | 16 (66.7%)                         | 8 (33.3%)                   |              |
| <b>Individual comorbidities<sup>1</sup></b>     |                                    |                             |              |
| Obesity                                         | 19 (50.0%)                         | 19 (50.0%)                  | <b>0.027</b> |
| Pulmonary disorders                             | 10 (71.4%)                         | 4 (28.6%)                   | 0.763        |
| Non-asthma pulmonary disorders                  | 4 (80.0%)                          | 1 (20.0%)                   | 0.652        |
| Asthma                                          | 6 (66.7%)                          | 3 (33.3%)                   | 1.0          |
| Prematurity (<37 weeks gestational age)         | 0                                  | 2 (100.0%)                  | 0.123        |
| Immunosuppression                               | 7 (87.5%)                          | 1 (12.5%)                   | 0.252        |
| Cancer                                          | 2 (100.0%)                         | 0                           | 0.537        |
| Anemia or hemoglobinopathy                      | 1 (50.0%)                          | 1 (50.0%)                   | 1.0          |
| Sickle cell anemia                              | 1 (50.0%)                          | 1 (50.0%)                   | 1.0          |
| Neurological disorders                          | 11 (57.9%)                         | 8 (42.1%)                   | 0.684        |
| Cardiac disorders                               | 4 (100.0%)                         | 0                           | 0.293        |
| Metabolic disorders                             | 3 (50.0%)                          | 3 (50.0%)                   | 0.662        |
| Diabetes mellitus                               | 2 (50.0%)                          | 2 (50.0%)                   | 0.613        |
| Renal disorders                                 | 2 (100.0%)                         | 0                           | 0.537        |
| Hypertension                                    | 1 (33.3%)                          | 2 (66.7%)                   | 0.286        |
| Chromosomal disorders                           | 0                                  | 1 (100.0%)                  | 0.355        |
| Other                                           | 6 (75.0%)                          | 2 (25.0%)                   | 0.707        |
| <b>Clinical Features</b>                        |                                    |                             |              |
| Fever prior to or during admission <sup>2</sup> | 43 (59.7%)                         | 29 (40.3%)                  | 0.075        |
| Cough                                           | 41 (60.3%)                         | 27 (39.7%)                  | 0.246        |
| Shortness of breath                             | 36 (56.2%)                         | 28 (43.7%)                  | <b>0.019</b> |
| Vomiting                                        | 23 (67.6%)                         | 11 (32.3%)                  | 0.799        |
| Rhinitis                                        | 12 (75.0%)                         | 4 (25.0%)                   | 0.401        |
| Diarrhea                                        | 23 (71.9%)                         | 9 (28.1%)                   | 0.397        |
| Abdominal pain                                  | 19 (67.8%)                         | 9 (32.1%)                   | 0.837        |
| Headache                                        | 19 (67.8%)                         | 9 (32.1%)                   | 0.837        |
| Rash                                            | 6 (60.0%)                          | 4 (40.0%)                   | 0.739        |
| Conjunctivitis                                  | 6 (54.5%)                          | 5 (45.4%)                   | 0.512        |

|                                                                  |            |            |               |
|------------------------------------------------------------------|------------|------------|---------------|
| Myalgia                                                          | 15 (71.4%) | 6 (28.6%)  | 0.622         |
| Pharyngitis                                                      | 18 (75.0%) | 6 (25.0%)  | 0.318         |
| Wheeze                                                           | 5 (71.4%)  | 2 (28.6%)  | 1.0           |
| Chest pain                                                       | 16 (66.7%) | 8 (33.3%)  | 0.994         |
| Cracked lips                                                     | 2 (40.0%)  | 3 (60.0%)  | 0.343         |
| Edema of hands and feet                                          | 3 (60.0%)  | 2 (40.0%)  | 1.0           |
| Anosmia                                                          | 6 (75.0%)  | 2 (25.0%)  | 0.707         |
| Seizures                                                         | 1 (50.0%)  | 1 (50.0%)  | 1.0           |
| <b>Coinfections</b>                                              |            |            |               |
| Bacterial (positive cultures) <sup>3</sup>                       | 4 (66.7%)  | 2 (33.3%)  | 1.0           |
| Viral                                                            | 2 (50.0%)  | 2 (50.0%)  | 0.613         |
| Bacterial and/or viral                                           | 6 (60.0%)  | 4 (40.0%)  | 0.739         |
| <b>Imaging</b>                                                   |            |            |               |
| No chest imaging done                                            | 12 (92.3%) | 1 (7.7%)   | <b>0.0039</b> |
| CXR and/or CT chest normal or had findings unrelated to COVID-19 | 13 (86.7%) | 2 (13.3%)  |               |
| CXR and/or CT chest abnormalities compatible with COVID-19       | 35 (53.8%) | 30 (46.1%) |               |
| <b>Laboratory investigations</b>                                 |            |            |               |
| Leukopenia (<4 X10 <sup>9</sup> /L) <sup>4</sup>                 | 14 (60.9%) | 9 (39.1%)  | 1.0           |
| Leukocytosis (>15x10 <sup>9</sup> /L) <sup>4</sup>               | 1 (33.3%)  | 2 (66.7%)  | 0.552         |
| Neutropenia (<1.5x 10 <sup>9</sup> /L) <sup>5</sup>              | 11 (64.7%) | 6 (35.3%)  | 0.068         |
| Normal neutrophil count <sup>5</sup>                             | 33 (71.7%) | 13 (28.3%) |               |
| Neutrophilia <sup>5</sup>                                        | 11 (44.0%) | 14 (56.0%) |               |
| Thrombocytopenia (<100 x 10 <sup>9</sup> /L) <sup>6</sup>        | 5 (62.5%)  | 3 (37.5%)  | 0.505         |
| Normal platelet count <sup>6</sup>                               | 46 (64.8%) | 25 (35.2%) |               |
| Thrombocytosis (>450 x 10 <sup>9</sup> /L) <sup>6</sup>          | 4 (44.4%)  | 5 (55.5%)  |               |
| CRP not done <sup>7</sup>                                        | 9 (100.0%) | 0          | <b>0.0147</b> |
| Normal CRP <sup>7</sup>                                          | 30 (68.2%) | 14 (31.8%) |               |
| CRP >50 (mg/L) <sup>7</sup>                                      | 21 (52.5%) | 19 (47.5%) |               |
| Ferritin >500 (mcg/L) <sup>8</sup>                               | 6 (35.3%)  | 11 (64.7%) | 0.281         |
| Albumin<29 (g/L) <sup>9</sup>                                    | 3 (33.3%)  | 6 (66.7%)  | 0.106         |
| <b>Complications</b>                                             |            |            |               |
| MIS-C diagnosis                                                  | 10 (55.5%) | 8 (44.4%)  | 0.541         |

CT computed tomography; CRP C-reactive protein; CXR chest x-ray; MIS-C multisystem inflammatory syndrome in children; PCR polymerase chain reaction; WHO World Health Organization.

\* Percentages were calculated for the row, i.e., % of a stratum with severe or mild/moderate disease.

\*\* Comparisons performed using chi squared or Fisher's exact test as appropriate for categorical data.

<sup>1</sup> Children are listed more than once if they had more than one comorbidity.

<sup>2</sup> A total of 7 children were missing data on fever prior to or during admission (5 with mild/moderate disease and 2 with severe disease) resulting in a total N of 86.

<sup>3</sup> Children with one of the following are included: blood culture thought to be truly positive and/or positive endotracheal tube cultures treated with antibiotics for presumptive bacterial pneumonia and/or positive bacterial culture from another site treated with antibiotics.

<sup>4</sup> A total of 4 children were missing leukocyte values (4 with mild/moderate disease) resulting in a total N of 89.

<sup>5</sup> A total of 5 children were missing neutrophil values (5 with mild/moderate disease) resulting in a total N of 88. Cut-off values for neutrophilia are age dependent

<sup>6</sup> A total of 5 children were missing platelet values (5 with mild/moderate disease) resulting in a total N of 88.

<sup>7</sup> A total of 9 children were missing a CRP value (9 with mild/moderate disease) resulting in a total N of 84.

<sup>8</sup> The highest ferritin value measured variable used and a total of 38 children were missing a value (33 with mild/moderate disease and 5 with severe disease) resulting in a total N of 55.

<sup>9</sup> A total of 64 children were missing albumin values (43 with mild/moderate disease and 21 with severe disease) resulting in a total N of 29.

**eTable 6.** Multivariable logistic regression models for factors associated with severe PCR-positive SARS-CoV-2 infection (WHO COVID-19 progression scale of  $\geq 6$ ), stratified according to age groups.

Model 1 incorporates selected individual comorbidities, model 2 the number of comorbidities while excluding individual comorbidities; both in children <12 years of age.

Model 3 is incorporates selected individual comorbidities in adolescents  $\geq 12$  years

| Covariates                                                 | Model 1:<br>Children < 12<br>years old<br>aOR (95% CI) | Model 2:<br>Children < 12<br>years old<br>aOR (95% CI) | Model 3:<br>Children $\geq 12$ years<br>old<br>aOR (95% CI) |
|------------------------------------------------------------|--------------------------------------------------------|--------------------------------------------------------|-------------------------------------------------------------|
| <b>Number of comorbidities</b>                             |                                                        |                                                        |                                                             |
| None                                                       | -                                                      | Ref.                                                   | -                                                           |
| 1 comorbidity                                              | -                                                      | 1.57 (0.69-3.60)                                       | -                                                           |
| Multiple (>2) comorbidities                                | -                                                      | <b>2.60 (1.12-6.06)</b>                                | -                                                           |
| <b>Individual comorbidities</b>                            |                                                        |                                                        |                                                             |
| Obesity                                                    | 1.17 (0.29-4.67)                                       | -                                                      | <b>3.21 (1.15-8.93)</b>                                     |
| Non-asthma pulmonary disorders                             | 1.68 (-0.45-6.22)                                      | -                                                      | -                                                           |
| Anemia or hemoglobinopathy                                 | -                                                      | -                                                      | -                                                           |
| Neurological disorders                                     | <b>3.16 (1.19-8.43)</b>                                | -                                                      | -                                                           |
| Cardiac disorders                                          | -                                                      | -                                                      | -                                                           |
| Hypertension                                               | -                                                      | -                                                      | -                                                           |
| Chromosomal disorders                                      | -                                                      | -                                                      | -                                                           |
| <b>Coinfections</b>                                        |                                                        |                                                        |                                                             |
| Bacterial and/or viral                                     | <b>2.60 (1.13-5.99)</b>                                | <b>2.50 (1.10-5.69)</b>                                | -                                                           |
| <b>Imaging</b>                                             |                                                        |                                                        |                                                             |
| No chest imaging done                                      | 0.15 (0.02-1.24)                                       | 0.16 (0.02-1.28)                                       | 0.82 (0.05-8.93)                                            |
| CXR and/or CT normal or had findings unrelated to COVID-19 | Ref.                                                   | Ref.                                                   | Ref.                                                        |
| CXR or CT abnormalities compatible with COVID-19           | <b>3.10 (1.49-6.42)</b>                                | <b>2.99 (1.45-6.18)</b>                                | <b>7.87 (1.32-46.97)</b>                                    |
| <b>Clinical presentation</b>                               |                                                        |                                                        |                                                             |
| Shortness of breath                                        | <b>5.02 (2.10-12.04)</b>                               | <b>5.03 (2.12-11.88)</b>                               | -                                                           |
| <b>Complications</b>                                       |                                                        |                                                        |                                                             |
| MIS-C diagnosis                                            | <b>4.85 (1.70-13.83)</b>                               | <b>4.92 (1.72-14.04)</b>                               | 1.11 (0.27-4.67)                                            |
| <b>Laboratory investigations</b>                           |                                                        |                                                        |                                                             |
| Neutrophilia                                               | 1.54 (0.74-3.22)                                       | 1.55 (0.75-3.22)                                       | <b>5.81 (1.85-18.22)</b>                                    |

aOR adjusted odds ratio; CI confidence interval; CT computed tomography; CXR chest x-ray; MIS-C multisystem inflammatory syndrome in children

**eTable 7.** Demographic and clinical characteristics among non-MIS-C patients (n=322) with PCR-positive SARS-CoV-2 infection, according to severity of disease (WHO COVID-19 clinical progression scale of  $\geq 6$ )

|                                             | Mild/Moderate Disease*<br>N=246 (%) | Severe Disease*<br>N=76 (%) | P-value**        | Unadjusted OR for severe disease |
|---------------------------------------------|-------------------------------------|-----------------------------|------------------|----------------------------------|
| <b>Demographics</b>                         |                                     |                             |                  |                                  |
| Median Age in years (IQR) <sup>1</sup>      | 2.08 (0.23-9.66)                    | 3.65 (0.98-14.41)           | <b>0.0062</b>    | <b>1.04 (1.00-1.09)</b>          |
| Age $\leq 30$ days                          | 34 (91.9%)                          | 3 (8.1%)                    | <b>0.0218</b>    | <b>0.26 (0.08-0.86)</b>          |
| Age category <sup>1</sup>                   |                                     |                             |                  |                                  |
| <1 year                                     | 94 (83.2%)                          | 19 (16.8%)                  | <b>0.0303</b>    | Ref.                             |
| 1-4 years                                   | 61 (71.8%)                          | 24 (28.2%)                  |                  | 1.95 (0.98-3.85)                 |
| 5-11 years                                  | 39 (83.0%)                          | 8 (17.0%)                   |                  | 1.01 (0.41-2.51)                 |
| $\geq 12$ years                             | 50 (66.7%)                          | 25 (33.3%)                  |                  | <b>2.47 (1.24-4.92)</b>          |
| Male sex                                    | 137 (76.5%)                         | 42 (23.5%)                  | 1.0              | 0.98 (0.58-1.65)                 |
| Admission period                            |                                     |                             |                  |                                  |
| Prior to July 1, 2020                       | 15 (88.2%)                          | 2 (11.8%)                   | 0.280            | Ref.                             |
| Between July 1, 2020 to Dec 31, 2020        | 93 (79.5%)                          | 24 (20.5%)                  |                  | 1.93 (0.41-9.05)                 |
| Between Jan 1, 2021 to May 31, 2021         | 138 (73.4%)                         | 50 (26.6%)                  |                  | 2.72 (0.60-12.31)                |
| Admitted in Canada                          | 158 (76.3%)                         | 49 (23.7%)                  | 1.0              | 1.01 (0.59-1.73)                 |
| <b>Number of comorbidities</b>              |                                     |                             |                  |                                  |
| None                                        | 128 (83.7%)                         | 25 (16.3%)                  | <b>0.0053</b>    | Ref.                             |
| At least 1 comorbidity                      | 118 (69.8%)                         | 51 (30.2%)                  |                  | <b>2.21 (1.29-3.80)</b>          |
| Multiple ( $\geq 2$ ) comorbidities         | 44 (63.8%)                          | 25 (36.2%)                  |                  | <b>2.25 (1.26-4.01)</b>          |
| None                                        | 128 (83.7%)                         | 25 (16.3%)                  | <b>0.0043</b>    | Ref.                             |
| 1 comorbidity                               | 74 (74.0%)                          | 26 (26.0%)                  |                  | 1.80 (0.97-3.34)                 |
| Multiple ( $\geq 2$ ) comorbidities         | 44 (63.8%)                          | 25 (36.2%)                  |                  | <b>2.91 (1.52-5.58)</b>          |
| <b>Individual comorbidities<sup>2</sup></b> |                                     |                             |                  |                                  |
| Obesity                                     | 24 (55.8%)                          | 19 (44.2%)                  | <b>0.0013</b>    | <b>3.08 (1.58-6.02)</b>          |
| Pulmonary disorders                         | 32 (64.0%)                          | 18 (36.0%)                  | <b>0.0389</b>    | <b>2.07 (1.09-3.96)</b>          |
| Non-asthma pulmonary disorders              | 12 (54.5%)                          | 10 (45.4%)                  | <b>0.0250</b>    | <b>2.95 (1.22-7.14)</b>          |
| Asthma                                      | 20 (71.4%)                          | 8 (28.6%)                   | 0.678            | 1.33 (0.56-3.15)                 |
| Prematurity (<37 weeks gestational age)     | 19 (65.5%)                          | 10 (34.5%)                  | 0.223            | 1.81 (0.80-4.08)                 |
| Immunosuppression                           | 24 (85.7%)                          | 4 (14.3%)                   | 0.350            | 0.51 (0.17-1.53)                 |
| Cancer                                      | 13 (92.8%)                          | 1 (7.1%)                    | 0.201            | 0.24 (0.03-1.86)                 |
| Anemia or hemoglobinopathy                  | 7 (63.6%)                           | 4 (36.4%)                   | 0.295            | 1.90 (0.54-6.66)                 |
| Sickle cell anemia                          | 4 (80.0%)                           | 1 (20.0%)                   | 1.0              | 0.81 (0.09-7.33)                 |
| Neurological disorders                      | 29 (56.9%)                          | 22 (43.1%)                  | <b>&lt;0.001</b> | <b>3.05 (1.62-5.72)</b>          |
| Cardiac disorders                           | 13 (68.4%)                          | 6 (31.6%)                   | 0.572            | 1.54 (0.56-4.19)                 |
| Metabolic disorders                         | 8 (72.7%)                           | 3 (27.3%)                   | 0.725            | 1.22 (0.32-4.73)                 |
| Diabetes mellitus                           | 3 (75.0%)                           | 1 (25.0%)                   | 1.0              | 1.08 (0.11-10.54)                |
| Renal disorders                             | 9 (69.2%)                           | 4 (30.8%)                   | 0.514            | 1.46 (0.44-4.89)                 |
| Hypertension                                | 4 (50.0%)                           | 4 (50.0%)                   | 0.093            | 3.36 (0.82-13.78)                |



|                                                                  |             |            |                  |                           |
|------------------------------------------------------------------|-------------|------------|------------------|---------------------------|
| Chromosomal disorders                                            | 2 (28.6%)   | 5 (71.4%)  | <b>0.0092</b>    | <b>8.59 (1.63-45.23)</b>  |
| Other                                                            | 15 (65.2%)  | 8 (34.8%)  | 0.291            | 1.81 (0.74-4.45)          |
| <b>Clinical Features</b>                                         |             |            |                  |                           |
| Fever prior to or during admission <sup>3</sup>                  | 172 (77.5%) | 50 (22.5%) | 0.955            | 1.08 (0.55-2.11)          |
| Cough                                                            | 132 (71.7%) | 52 (28.3%) | <b>0.0323</b>    | <b>1.87 (1.08-3.23)</b>   |
| Shortness of breath                                              | 105 (61.0%) | 67 (38.9%) | <b>&lt;0.001</b> | <b>10.00 (4.77-20.96)</b> |
| Vomiting                                                         | 56 (80.0%)  | 14 (20.0%) | 0.520            | 0.77 (0.40-1.47)          |
| Rhinitis                                                         | 85 (78.0%)  | 24 (22.0%) | 0.734            | 0.87 (0.50-1.51)          |
| Diarrhea                                                         | 57 (82.6%)  | 12 (17.4%) | 0.226            | 0.62 (0.31-1.23)          |
| Abdominal pain                                                   | 35 (81.4%)  | 8 (18.6%)  | 0.525            | 0.71 (0.31-1.60)          |
| Headache                                                         | 26 (78.8%)  | 7 (21.2%)  | 0.900            | 0.86 (0.36-2.06)          |
| Rash                                                             | 15 (78.9%)  | 4 (21.0%)  | 1.0              | 0.85 (0.27-2.66)          |
| Conjunctivitis                                                   | 7 (87.5%)   | 1 (12.5%)  | 0.686            | 0.45 (0.05-3.76)          |
| Myalgia                                                          | 30 (76.9%)  | 9 (23.1%)  | 1.0              | 0.97 (0.44-2.14)          |
| Pharyngitis                                                      | 32 (88.9%)  | 4 (11.1%)  | 0.063            | 0.37 (0.13-1.09)          |
| Wheeze                                                           | 36 (69.2%)  | 16 (30.8%) | 0.250            | 1.55 (0.81-2.99)          |
| Chest pain                                                       | 26 (81.2%)  | 6 (18.7%)  | 0.644            | 0.72 (0.29-1.83)          |
| Cracked lips                                                     | 2 (66.7%)   | 1 (33.3%)  | 0.555            | 1.63 (0.14-18.19)         |
| Edema of hands and feet                                          | 1 (50.0%)   | 1 (50.0%)  | 0.417            | 3.27 (0.20-52.86)         |
| Anosmia                                                          | 7 (87.5%)   | 1 (12.5%)  | 0.686            | 0.45 (0.05-3.76)          |
| Seizures                                                         | 6 (54.5%)   | 5 (45.4%)  | 0.139            | 2.82 (0.83-9.50)          |
| <b>Coinfections</b>                                              |             |            |                  |                           |
| Bacterial (positive cultures) <sup>4</sup>                       | 10 (52.6%)  | 9 (47.4%)  | <b>0.0253</b>    | <b>3.17 (1.24-8.12)</b>   |
| Viral                                                            | 13 (46.4%)  | 15 (53.6%) | <b>&lt;0.001</b> | <b>4.41 (1.99-9.75)</b>   |
| Bacterial and/or viral                                           | 23 (51.1%)  | 22 (48.9%) | <b>&lt;0.001</b> | <b>3.95 (2.05-7.61)</b>   |
| <b>Imaging</b>                                                   |             |            |                  |                           |
| No chest imaging done                                            | 72 (97.3%)  | 2 (2.7%)   | <b>&lt;0.001</b> | Ref.                      |
| CXR and/or CT chest normal or had findings unrelated to COVID-19 | 78 (85.7%)  | 13 (14.3%) |                  | <b>0.17 (0.04-0.76)</b>   |
| CXR and/or CT chest abnormalities compatible with COVID-19       | 96 (61.1%)  | 61 (38.8%) |                  | <b>3.81 (1.95-7.44)</b>   |
| <b>Laboratory investigations</b>                                 |             |            |                  |                           |
| Leukopenia (<4 X10 <sup>9</sup> /L) <sup>5</sup>                 | 42 (77.8%)  | 12 (22.2%) | 0.798            | 0.86 (0.42-1.73)          |
| Leukocytosis (>15x10 <sup>9</sup> /L) <sup>5</sup>               | 31 (77.5%)  | 9 (22.5%)  | 0.905            | 0.88 (0.40-1.94)          |
| Neutropenia (<1.5x 10 <sup>9</sup> /L) <sup>6</sup>              | 64 (81.0%)  | 15 (19.0%) | <b>0.0055</b>    | 0.85 (0.43-1.68)          |
| Normal neutrophil count <sup>6</sup>                             | 124 (78.5%) | 34 (21.5%) |                  | Ref.                      |
| Neutrophilia <sup>6</sup>                                        | 39 (60.0%)  | 26 (40.0%) |                  | <b>2.43 (1.30-4.54)</b>   |
| Thrombocytopenia (<100 x 10 <sup>9</sup> /L) <sup>7</sup>        | 19 (73.1%)  | 7 (26.9%)  | 0.291            | 1.27 (0.51-3.19)          |
| Normal platelet count <sup>7</sup>                               | 176 (77.5%) | 51 (22.5%) |                  | Ref.                      |
| Thrombocytosis (>450 x 10 <sup>9</sup> /L) <sup>7</sup>          | 35 (67.3%)  | 17 (32.7%) |                  | 1.68 (0.87-3.24)          |
| CRP not done <sup>8</sup>                                        | 51 (86.4%)  | 8 (13.5%)  | <b>0.0033</b>    | Ref.                      |
| Normal CRP <sup>8</sup>                                          | 168 (77.4%) | 49 (22.6%) |                  | 1.86 (0.83-4.18)          |
| CRP >50 (mg/L) <sup>8</sup>                                      | 27 (58.7%)  | 19 (41.3%) |                  | <b>4.49 (1.74-11.58)</b>  |

|                                    |            |           |               |                          |
|------------------------------------|------------|-----------|---------------|--------------------------|
| Ferritin >500 (mcg/L) <sup>9</sup> | 10 (52.6%) | 9 (47.4%) | 0.697         | 1.39 (0.51-3.78)         |
| Albumin <29 (g/L) <sup>10</sup>    | 4 (36.4%)  | 7 (63.6%) | <b>0.0345</b> | <b>4.53 (1.17-17.47)</b> |

OR, odds ratio; CT computed tomography; CRP C-reactive protein; CXR chest x-ray; IQR interquartile range; MIS-C multisystem inflammatory syndrome in children; PCR polymerase chain reaction; WHO World Health Organization.

\* Percentages were calculated for the row, i.e., % of a stratum with severe or mild/moderate disease.

\*\* Comparisons performed using chi squared or Fisher's exact test as appropriate for categorical data and Wilcoxon rank sum test for continuous data as appropriate.

<sup>1</sup> A total of 2 children with mild/moderate disease are missing date of birth.

<sup>2</sup> Children are listed more than once if they had more than one comorbidity.

<sup>3</sup> A total of 34 children were missing data on fever prior to or during admission (22 with mild/moderate disease and 12 with severe disease) resulting in a total N of 288.

<sup>4</sup> Children with one of the following are included: blood culture thought to be truly positive and/or positive endotracheal tube cultures treated with antibiotics for presumptive bacterial pneumonia and/or positive bacterial culture from another site treated with antibiotics.

<sup>5</sup> A total of 16 children were missing leukocyte values (15 with mild/moderate disease and 1 with severe disease) resulting in a total N of 306.

<sup>5</sup> A total of 20 children were missing neutrophil values (19 with mild/moderate disease and 1 with severe disease) resulting in a total N of 302. Cut-off values for neutrophilia are age dependent.

<sup>7</sup> A total of 17 children were missing platelet values (16 with mild/moderate disease and 1 with severe disease) resulting in a total N of 305.

<sup>8</sup> A total of 59 children were missing a CRP value (51 with mild/moderate disease and 8 with severe disease) resulting in a total N of 263.

<sup>9</sup> The highest ferritin value measured variable used and a total of 219 children were missing a value (185 with mild/moderate disease and 34 with severe disease) resulting in a total N of 103.

<sup>10</sup> A total of 250 children were missing albumin values (198 with mild/moderate disease and 52 with severe disease) resulting in a total N of 72.

**eTable 8.** Multivariable logistic regression models among non-MIS-C patients for factors associated with severe PCR-positive SARS-CoV-2 infection (WHO COVID-19 clinical progression scale of  $\geq 6$ ).

Model 1 incorporates the number of comorbidities, model 2 selected individual comorbidities.

| Covariates                                                 | Model 1<br>aOR (95% CI)  | Model 2<br>aOR (95% CI)  |
|------------------------------------------------------------|--------------------------|--------------------------|
| <b>Age category</b>                                        |                          |                          |
| <1 year                                                    | Ref.                     | Ref.                     |
| 1-4 years                                                  | 1.00 (0.41-2.47)         | 1.04 (0.43-2.52)         |
| 5-11 years                                                 | 0.36 (0.11-1.18)         | 0.31 (0.09-1.08)         |
| $\geq 12$ years                                            | 0.86 (0.35-2.14)         | 0.62 (0.23-1.70)         |
| <b>Number of comorbidities</b>                             |                          |                          |
| None                                                       | Ref.                     | -                        |
| 1 comorbidity                                              | 2.04 (0.92-4.54)         | -                        |
| Multiple ( $\geq 2$ ) comorbidities                        | <b>2.72 (1.16-6.39)</b>  | -                        |
| <b>Individual comorbidities</b>                            |                          |                          |
| Obesity                                                    | -                        | <b>2.67 (1.00-7.15)</b>  |
| Neurological disorder                                      | -                        | <b>4.39 (1.88-10.28)</b> |
| <b>Coinfections</b>                                        |                          |                          |
| Bacterial and/or viral                                     | <b>2.56 (1.17-5.59)</b>  | <b>2.84 (1.28-6.30)</b>  |
| <b>Imaging</b>                                             |                          |                          |
| No chest imaging done                                      | 0.47 (0.09-2.36)         | 0.43 (0.08-2.22)         |
| CXR and/or CT normal or had findings unrelated to COVID-19 | Ref.                     | Ref.                     |
| CXR or CT abnormalities compatible with COVID-19           | <b>3.05 (1.38-6.71)</b>  | <b>3.03 (1.36-6.77)</b>  |
| <b>Clinical presentation</b>                               |                          |                          |
| Shortness of breath                                        | <b>5.17 (2.28-11.69)</b> | <b>4.92 (2.12-11.41)</b> |
| <b>Laboratory investigations</b>                           |                          |                          |
| Neutrophilia                                               | 1.89 (0.91-3.92)         | 1.98 (0.94-4.20)         |

aOR adjusted odds ratio; CI confidence interval; CRP C-reactive protein; CT computed tomography; CXR chest x-ray
